# Supplementary material for: The Natural-Based Antitumor Compound T21 Decreases Survivin Levels through Potent STAT3 Inhibition in Lung Cancer Models
Source: MDPI journal article supplement (doi:10.3390/biom9080361), 2019-08-13
Supplement: s1 [file s1]

1 **Supplementary Figures**

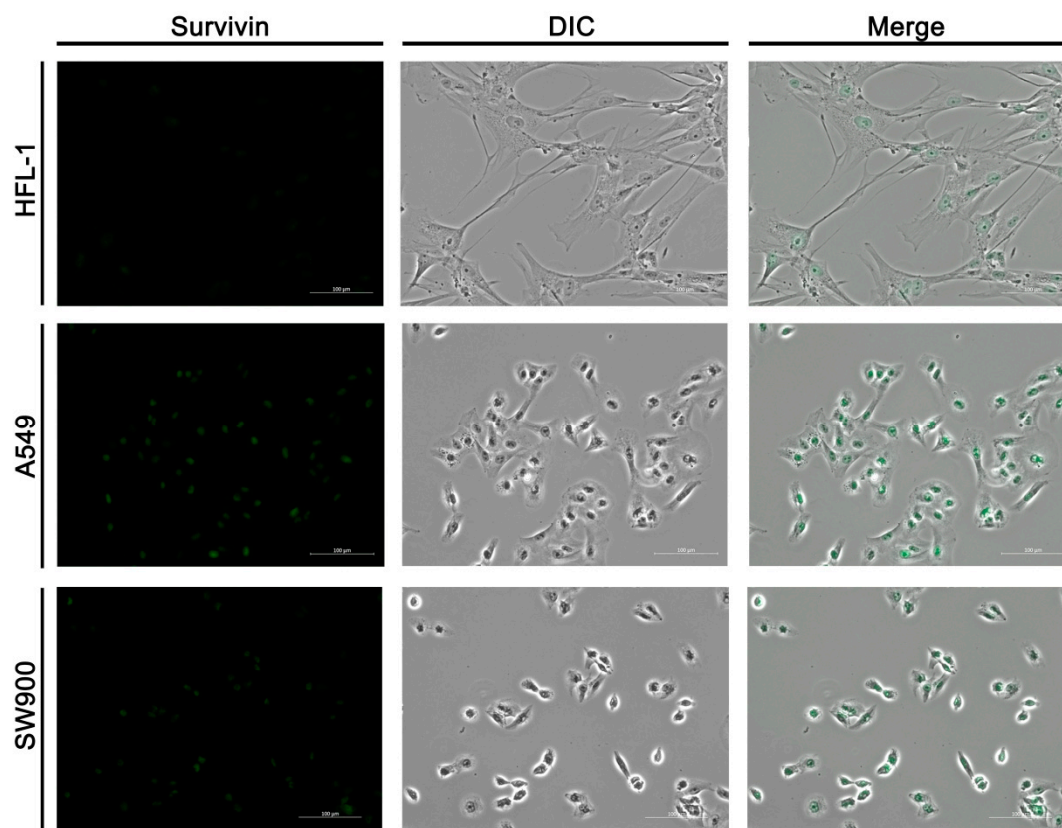

2

3 **Figure S1.** Survivin expression on normal (HFL-1) and lung cancer cells (A549, SW900). Survivin protein levels  
 4 and localization were analyzed by immunocytochemistry.

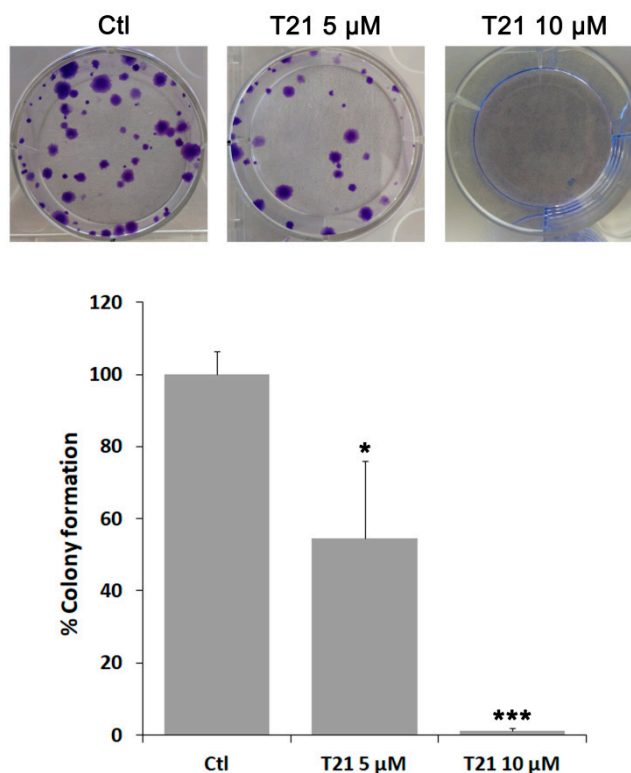

5

6 **Figure S2.** Effects of T21 on cell viability by a clonogenic assay. A549 cells were treated with T21 at  
 7 concentrations ranging 2.5 – 10 μM for 24 h. A clonogenic assay was performed, (A) colonies were counted and  
 8 (B) percentage of colony formation was calculated referred to control cells.

9

10

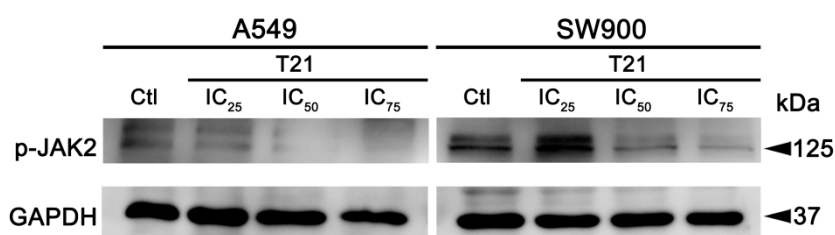

11

12 **Figure S3.** JAK2 activity after T21 treatment. JAK2 phosphorylation levels were assessed by immunoblot after  
 13 treating A549 and SW900 cells with their respective IC values for 24 h.

14
